# Supplementary material for: Changes of Exhaled Volatile Organic Compounds in Postoperative Patients Undergoing Analgesic Treatment: A Prospective Observational Study
Source: MDPI journal article supplement (doi:10.3390/metabo10080321), 2020-08-07
Supplement: s1 [file s1]

**Table S1** Table that demonstrates individual pre-existing conditions and the specific indications for surgery for each patient

| Patient | Surgical indication                 | Pre-existing conditions                                                                                                                                            |
|---------|-------------------------------------|--------------------------------------------------------------------------------------------------------------------------------------------------------------------|
| 1       | colorectal carcinoma                | history of smoking                                                                                                                                                 |
| 2       | abdominal aortic aneurysm           | obesity, arterial hypertension                                                                                                                                     |
| 3       | arthrosis                           | obesity                                                                                                                                                            |
| 4       | pancreatitis                        | arterial hypertension, depression, history of deep vein thrombosis                                                                                                 |
| 5       | infection after hip replacement     | renal failure, arterial hypertension, factor XIII deficiency, alcohol-related liver cirrhosis, history of smoking                                                  |
| 6       | occlusion of femoropopliteal bypass | arterial hypertension, CHD, hyperlipoproteinemia, PAD                                                                                                              |
| 7       | goiter                              | obesity, OSA, arterial hypertension, hyperuricemia                                                                                                                 |
| 8       | proctitis                           | ulcerative colitis                                                                                                                                                 |
| 9       | spinal disc herniation              | history of smoking, alcohol abuse                                                                                                                                  |
| 10      | cholecystitis                       | obesity                                                                                                                                                            |
| 11      | spinal disc herniation              | obesity                                                                                                                                                            |
| 12      | fracture of thoracic vertebra       | obesity, arterial hypertension, benign prostatic hyperplasia, depression, anxiety disorder, hypogonadism                                                           |
| 13      | necrosis of amputation stump        | arterial hypertension, PAD, CHD, hyperlipidaemia, degenerative lumbar spinal syndrome, history of smoking                                                          |
| 14      | delayed wound healing (thumb)       | obesity, history of smoking                                                                                                                                        |
| 15      | Delayed wound healing (foot)        | arterial hypertension, diabetes mellitus                                                                                                                           |
| 16      | goiter                              | arterial hypertension, renal failure, hyperparathyroidism with severe hypercalcemia, steatosis hepatis, depression, benign prostate hyperplasia                    |
| 17      | inguinal hernia                     | history of smoking, polyneuropathy, venous insufficiency, atrial fibrillation, COPD, asthma, chronic heart failure, pulmonary arterial hypertension, cor pulmonale |
| 18      | spinal disc herniation              | CHD, arterial hypertension, renal failure, hypothyroidism, stenosis of coeliac trunk                                                                               |
| 19      | hepatic metastases                  | obesity, arterial hypertension, CHD, history of coronary aneurysm, PAD, hyperlipoproteinemia, COPD, OSA, axial hiatal hernia                                       |
| 20      | tendinosis of calcaneal tendon      | obesity                                                                                                                                                            |

PAD: Peripheral Artery Disease; OSA: Obstructive Sleep Apnea; CHD: Coronary Heart Disease; COPD Chronic Obstructive Pulmonary Disease
