# Supplementary material for: Changes of Exhaled Volatile Organic Compounds in Postoperative Patients Undergoing Analgesic Treatment: A Prospective Observational Study
Source: MDPI journal article supplement (doi:10.3390/metabo10080321), 2020-08-07
Supplement: s1 [file s1]

**Table S3** Table that demonstrates cardiovascular variables during analgesic treatment

|                            | (A)<br>0 min  | (B)<br>15 min | (C)<br>30 min | P     | P<br>(A vs B) | P<br>(A vs C) | P<br>(B vs C) |
|----------------------------|---------------|---------------|---------------|-------|---------------|---------------|---------------|
| SAP (mmHg)                 | 131 (97;138)  | 127 (113;147) | 132 (112;140) | 0.001 | 0.004         | <0.001        | 0.708         |
| DAP (mmHg)                 | 66 (56;75)    | 68 (58;78)    | 67 (58;80)    | 0.655 | n.a.          | n.a.          | n.a.          |
| MAP (mmHg)                 | 89 (74;101)   | 93 (81;104)   | 93 (79;104)   | 0.013 | 0.017         | 0.004         | 0.317         |
| HR (bpm)                   | 74 (68;79)    | 73 (70;79)    | 73 (67;78)    | 0.504 | n.a.          | n.a.          | n.a.          |
| CI (L/min/m <sup>2</sup> ) | 3.6 (2.3;4.6) | 3.7 (2.8;4.3) | 3.4 (2.9;4.3) | 0.034 | 0.036         | 0.034         | 0.169         |
| SVI (ml/m <sup>2</sup> )   | 48 (36;60)    | 50 (45;56)    | 50 (43;56)    | 0.116 | n.a.          | n.a.          | n.a.          |

Data are given as median (25<sup>th</sup>;75<sup>th</sup>) percentile. SAP: Systolic Arterial Pressure; DAP: Diastolic Arterial Pressure; MAP: Mean Arterial Pressure; HR: Heart Rate; CI: Cardiac Index; SVI: Stroke Volume Index; n.a.: not applicable
