# Supplementary material for: Changes of Exhaled Volatile Organic Compounds in Postoperative Patients Undergoing Analgesic Treatment: A Prospective Observational Study
Source: MDPI journal article supplement (doi:10.3390/metabo10080321), 2020-08-07
Supplement: s1 [file s1]

**Table S2** Table that demonstrates relative changes of VOC over time

| VOC                             | (B)<br>(%) Change of normalized values<br>after 15 min | (C)<br>(%) Change of normalized values<br>after 30 min | P<br>Friedman | P<br>A vs B | P<br>A vs C | P<br>B vs C |
|---------------------------------|--------------------------------------------------------|--------------------------------------------------------|---------------|-------------|-------------|-------------|
| acetonitrile                    | -18.6                                                  | -25.2                                                  | <0.001        | <0.001      | <0.001      | 0.014       |
| acetaldehyde                    | -4.53                                                  | -9.93                                                  | 0.002         | 0.001       | 0.002       | 0.118       |
| ethanol                         | -12.97                                                 | -22.04                                                 | 0.004         | 0.002       | 0.003       | 0.146       |
| methanethiol                    | -8.55                                                  | -10.46                                                 | <0.001        | 0.004       | <0.001      | <0.001      |
| acrolein                        | -9.41                                                  | -10.41                                                 | 0.044         | 0.118       | 0.038       | 0.057       |
| acetone (via isotope at m/z 60) | -1.66                                                  | -1.18                                                  | 0.65          | n.a.        | n.a.        | n.a.        |
| acetic acid                     | +8.68                                                  | +14.62                                                 | 0.892         | n.a.        | n.a.        | n.a.        |
| propanol                        | -23.68                                                 | -24.74                                                 | <0.001        | <0.001      | <0.001      | 0.314       |
| dimethyl-sulfide                | -1.59                                                  | -4.27                                                  | 0.89          | n.a.        | n.a.        | n.a.        |
| isoprene                        | -4.57                                                  | -5.77                                                  | 0.157         | n.a.        | n.a.        | n.a.        |
| butenal                         | +3.92                                                  | -1.54                                                  | 0.212         | n.a.        | n.a.        | n.a.        |
| butanal                         | -3.30                                                  | -2.04                                                  | 0.457         | n.a.        | n.a.        | n.a.        |
| methylacetate                   | +0.68                                                  | +3.05                                                  | 0.182         | n.a.        | n.a.        | n.a.        |
| 1,2-propanediol                 | -4.21                                                  | -4.01                                                  | 0.987         | n.a.        | n.a.        | n.a.        |
| benzene                         | -26.02                                                 | -30.23                                                 | <0.001        | <0.001      | 0.001       | 0.044       |
| cyclohexadiene                  | +68.33                                                 | +35.56                                                 | 0.247         | n.a.        | n.a.        | n.a.        |
| pentanal                        | -4.67                                                  | -4.31                                                  | 0.856         | n.a.        | n.a.        | n.a.        |
| ethylacetate                    | +11.25                                                 | +8.27                                                  | 0.387         | n.a.        | n.a.        | n.a.        |
| 1-butanethiol                   | +0.73                                                  | -5.41                                                  | 0.004         | 0.823       | 0.01        | <0.001      |
| hexenal                         | -1.11                                                  | -18.63                                                 | <0.001        | <0.001      | <0.001      | <0.001      |
| cyclooctadiene                  | -0,87                                                  | -3,71                                                  | 0.164         | n.a.        | n.a.        | n.a.        |
| acetophenone                    | +7.15                                                  | -0.071                                                 | 0.074         | n.a.        | n.a.        | n.a.        |
| benzopyran                      | -7.40                                                  | -11.21                                                 | 0.003         | 0.007       | 0.003       | 0.044       |
| limonene                        | +0.82                                                  | +9.64                                                  | 0.158         | n.a.        | n.a.        | n.a.        |

Differences of VOCs are given in percentage from baseline value with corresponding significances. VOC: Volatile Organic Compound; n.a.: not applicable
